# Supplementary material
Source: PubMed Central journal article supplement (PMC4274226)
Supplement: NIHMS617987-supplement-01.pdf [file NIHMS617987-supplement-01.pdf]

## Appendix

**Appendix Table 1.** Sociodemographic Characteristics of the Analytic Sample Compared to Excluded Respondents, Add Health Wave IV (N=14,800)

| Characteristics, n<br>(weighted %)     | Women                             |                                         | Men                               |                                         |
|----------------------------------------|-----------------------------------|-----------------------------------------|-----------------------------------|-----------------------------------------|
|                                        | Included in<br>Sample<br>(n=7068) | Excluded for<br>Missing Data<br>(n=802) | Included in<br>Sample<br>(n=6020) | Excluded for<br>Missing Data<br>(n=910) |
| Race/ethnicity                         |                                   |                                         |                                   |                                         |
| Non-Hispanic White                     | 3745 (66.1)                       | 390 (61.9)                              | 3317 (67.2)                       | 425 (55.4)                              |
| Non-Hispanic Black                     | 1627 (16.1)                       | 206 (18.7)                              | 1151 (14.6)                       | 239 (23.6)                              |
| Hispanic/Latino                        | 1123 (11.8)                       | 116 (13.7)                              | 984 (11.9)                        | 135 (12.5)                              |
| Non-Hispanic other                     | 573 (6.0)                         | 83 (5.7)                                | 568 (6.3)                         | 106 (8.5)                               |
|                                        |                                   | F=0.93                                  |                                   | <b>F=9.22</b>                           |
| Age                                    |                                   |                                         |                                   |                                         |
| 24-27 years                            | 2252 (37.4)                       | 260 (36.5)                              | 1667 (34.2)                       | 254 (35.5)                              |
| 28-29 years                            | 2634 (34.0)                       | 282 (33.3)                              | 2262 (33.2)                       | 323 (32.1)                              |
| 30+ years                              | 2182 (28.6)                       | 260 (30.1)                              | 2091 (32.6)                       | 333 (32.4)                              |
|                                        |                                   | F=0.23                                  |                                   | F=0.12                                  |
| Current education                      |                                   |                                         |                                   |                                         |
| Any or completed<br>high school or GED | 1389 (21.5)                       | 170 (27.8)                              | 1675 (31.1)                       | 304 (38.3)                              |
| Some college                           | 3146 (44.5)                       | 358 (44.0)                              | 2656 (42.1)                       | 361 (36.8)                              |
| College graduate                       | 2533 (34.0)                       | 272 (28.2)                              | 1689 (26.8)                       | 243 (25.0)                              |
|                                        |                                   | F=2.80                                  |                                   | <b>F=4.19</b>                           |
| Household income per<br>member         |                                   |                                         |                                   |                                         |
| <\$10,000                              | 2127 (31.6)                       | 318 (43.2)                              | 1409 (25.2)                       | 367 (46.4)                              |
| \$10,000-\$24,999                      | 2545 (35.0)                       | 267 (31.0)                              | 2184 (35.5)                       | 244 (25.2)                              |
| \$25,000+                              | 2396 (33.3)                       | 217 (25.8)                              | 2427 (39.4)                       | 299 (28.4)                              |
|                                        |                                   | <b>F=8.59</b>                           |                                   | <b>F=35.74</b>                          |
| Urbanicity                             |                                   |                                         |                                   |                                         |
| Urban                                  | 2687 (34.5)                       | 42 (39.5)                               | 2256 (35.3)                       | 33 (42.3)                               |
| Suburban                               | 3077 (44.9)                       | 31 (43.1)                               | 2573 (42.1)                       | 41 (42.0)                               |
| Rural                                  | 1304 (20.6)                       | 27 (17.4)                               | 1191 (22.7)                       | 18 (15.7)                               |
|                                        |                                   | F=0.18                                  |                                   | F=1.06                                  |
| Region                                 |                                   |                                         |                                   |                                         |
| West                                   | 1650 (16.9)                       | 187 (22.1)                              | 1388 (16.0)                       | 228 (15.7)                              |
| Midwest                                | 1844 (32.6)                       | 160 (23.5)                              | 1565 (31.2)                       | 203 (27.9)                              |
| South                                  | 2649 (37.3)                       | 352 (40.5)                              | 2259 (38.8)                       | 386 (43.2)                              |
| Northeast                              | 925 (13.2)                        | 103 (14.0)                              | 808 (14.0)                        | 93 (13.2)                               |
|                                        |                                   | F=2.07                                  |                                   | F=0.78                                  |

GED, general educational development certificate

Boldface indicates statistically significantly different from analytic sample ( $p < 0.05$ ).

**Appendix Table 2.** Sexual Minority Indicator Endorsement by Sexual Minority Status and Sex<sup>a</sup>

| <b>Sexual<br/>Minority<br/>Indicator<br/>n (Weighted %)</b> | <b>Sexual Minority –<br/>Any One Indicator</b> |                        | <b>Sexual Minority –<br/>All Three Indicators</b> |                        | <b>Sexual Minority –<br/>Attraction Plus</b> |                        |
|-------------------------------------------------------------|------------------------------------------------|------------------------|---------------------------------------------------|------------------------|----------------------------------------------|------------------------|
|                                                             | <b>Women<br/>(n=1690)</b>                      | <b>Men<br/>(n=572)</b> | <b>Women<br/>(n=437)</b>                          | <b>Men<br/>(n=200)</b> | <b>Women<br/>(n=288)</b>                     | <b>Men<br/>(n=189)</b> |
| Attraction                                                  | 645 (39.2)                                     | 270 (45.2)             | 437 (100)                                         | 200 (100)              | 288 (100)                                    | 189 (100)              |
| Behavior                                                    | 966 (58.3)                                     | 385 (65.1)             | 437 (100)                                         | 200 (100)              | 263<br>(95.1)                                | 182 (95.3)             |
| Identity                                                    | 1380 (81.0)                                    | 399 (69.0)             | 437 (100)                                         | 200 (100)              | 282<br>(97.8)                                | 187 (99.9)             |

<sup>a</sup>The sexual minority groups are not mutually exclusive.

**Appendix Table 3.** Interactions between Sex and Sexual Minority Status with Coefficient Contrasts between Sexes in Regression Analyses<sup>a</sup>

| Health Measure                         | Sexual Minority –<br>Any One Indicator |                              | Sexual Minority –<br>All Three Indicators |                              | Sexual Minority – Attraction Plus |                              |
|----------------------------------------|----------------------------------------|------------------------------|-------------------------------------------|------------------------------|-----------------------------------|------------------------------|
|                                        | Interaction OR<br>(95% CI)             | Wald Test of<br>Contrast – F | Interaction OR<br>(95% CI)                | Wald Test of<br>Contrast – F | Interaction OR<br>(95% CI)        | Wald Test of<br>Contrast – F |
| Fair or poor self-rated health         | <b>0.65 (0.41-1.02)*</b>               | <b>3.56*</b>                 | <b>0.48 (0.23-0.97)**</b>                 | <b>4.21**</b>                | <b>0.45 (0.21-0.95)*</b>          | <b>4.49**</b>                |
| Diagnosed physical illness             |                                        |                              |                                           |                              |                                   |                              |
| Asthma/chronic<br>bronchitis/emphysema | 1.03 (0.69-1.54)                       | 0.02                         | 0.89 (0.46-1.72)                          | 0.13                         | 0.75 (0.35-1.59)                  | 0.57                         |
| Migraine headaches                     | 1.40 (0.89-2.21)                       | 2.22                         | 1.30 (0.66-2.57)                          | 0.59                         | 1.34 (0.67-2.67)                  | 0.71                         |
| High cholesterol                       | 1.02 (0.62-1.69)                       | 0.01                         | 0.71 (0.31-1.64)                          | 0.65                         | 0.57 (0.27-1.19)                  | 2.31                         |
| High blood pressure                    | 1.01 (0.67-1.55)                       | <0.01                        | 1.37 (0.72-2.60)                          | 0.93                         | 1.12 (0.54-2.30)                  | 0.09                         |
| Diagnosed mental illness               |                                        |                              |                                           |                              |                                   |                              |
| Depression                             | 1.02 (0.69-1.52)                       | 0.01                         | 1.07 (0.61-1.86)                          | 0.05                         | 1.29 (0.69-2.41)                  | 0.67                         |
| Anxiety/panic disorder                 | <b>0.74 (0.51-1.06)*</b>               | <b>2.81*</b>                 | 1.06 (0.61-1.83)                          | 0.04                         | 1.11 (0.59-2.10)                  | 0.11                         |
| ADHD/attention problems                | <b>0.60 (0.34-1.06)*</b>               | <b>3.15*</b>                 | <b>0.44 (0.17-1.13)*</b>                  | <b>2.97*</b>                 | <b>0.39 (0.14-1.12)*</b>          | <b>3.12*</b>                 |
| Diagnosed STI                          |                                        |                              |                                           |                              |                                   |                              |
| Lifetime                               | 0.87 (0.61-1.23)                       | 0.63                         | 1.43 (0.90-2.30)                          | 2.30                         | <b>2.03 (1.20-<br/>3.44)**</b>    | <b>7.09**</b>                |
| In past year                           | 1.20 (0.74-1.94)                       | 0.58                         | 1.51 (0.80-2.85)                          | 1.68                         | <b>1.99 (0.94-4.19)*</b>          | <b>3.32†</b>                 |
| BMI classification <sup>b</sup>        |                                        |                              |                                           |                              |                                   |                              |
| Normal or Underweight                  | 1.00 [Referent]                        | --                           | 1.00 [Referent]                           | --                           | 1.00 [Referent]                   | --                           |
| Overweight                             | 0.82 (0.58-1.17)                       | 1.24                         | 0.78 (0.48-1.28)                          | 0.99                         | 0.71 (0.40-1.28)                  | 1.31                         |
| Obese                                  | <b>0.69 (0.49-0.98)*</b>               | <b>4.36**</b>                | 0.68 (0.40-1.17)                          | 1.95                         | <b>0.51 (0.27-<br/>0.93)**</b>    | <b>4.86**</b>                |
| Meeting CES-D depression<br>criteria   | <b>0.70 (0.49-0.99)*</b>               | <b>3.96**</b>                | <b>0.48 (0.26-0.88)**</b>                 | <b>5.78*</b>                 | <b>0.48 (0.24-<br/>0.93)**</b>    | <b>4.79**</b>                |
| Medication use                         |                                        |                              |                                           |                              |                                   |                              |
| Antidepressant                         | 0.93 (0.53-1.64)                       | 0.06                         | 1.62 (0.76-3.45)                          | 1.58                         | 1.70 (0.71-4.07)                  | 1.45                         |
| Anxiolytic                             | <b>1.84 (0.98-3.48)*</b>               | <b>3.61*</b>                 | 2.01 (0.81-4.95)                          | 2.33                         | <b>2.88 (1.05-7.85)*</b>          | <b>4.33**</b>                |
| Uninsured                              | 0.96 (0.72-1.29)                       | 0.08                         | <b>0.40 (0.24-0.66)**</b>                 | <b>12.84**</b>               | <b>0.36 (0.21-0.61)*</b>          | <b>14.14**</b>               |
| Forgone care in past year              | <b>0.62 (0.46-0.83)**</b>              | <b>10.14**</b>               | <b>0.30 (0.17-0.54)**</b>                 | <b>16.85**</b>               | <b>0.34 (0.19-</b>                | <b>14.64**</b>               |

|                          |                           |               |                           |                |                           |                |
|--------------------------|---------------------------|---------------|---------------------------|----------------|---------------------------|----------------|
| Healthcare in past year  |                           |               |                           |                | <b>0.59**</b>             |                |
| Physical examination     | <b>1.60 (1.18-2.16)**</b> | <b>9.43**</b> | <b>2.98 (1.61-5.52)**</b> | <b>12.33**</b> | <b>3.14 (1.60-6.16)**</b> | <b>11.26**</b> |
| Dental examination       | <b>1.36 (1.04-1.78)**</b> | <b>5.22**</b> | <b>2.62 (1.57-4.40)**</b> | <b>13.65**</b> | <b>2.76 (1.59-4.80)**</b> | <b>13.26**</b> |
| Psychological counseling | <b>2.59 (2.09-3.22)**</b> | <b>5.33**</b> | 0.88 (0.44-1.73)          | 0.15           | 0.76 (0.35-1.64)          | 0.51           |

ADHD, attention deficit hyperactivity disorder; CES-D, Centers for Epidemiologic Studies Depression scale; STI, sexually transmitted infection

Boldface indicates statistical significance (\*p<0.10; \*\*p<0.05)

<sup>a</sup> Unadjusted analyses. Most results did not differ appreciably for models adjusted for age, race/ethnicity, current educational attainment, standardized household income, and urbanicity and region of residence. Exceptions were that interactions were significant at p<0.10 for diagnosed migraine headaches among the Any One indicator group and for diagnosed high cholesterol among the Attraction Plus group in adjusted models.

<sup>b</sup> Multinomial logistic regression was used for BMI classification whereas binary logistic models were used for all other health measures.
